# Supplementary material
Source: PubMed Central journal article supplement (PMC4475865)

Table S1. The phylogenetic affiliation of the unique OTUs in the six replicate samples of the three dilutions of a soil suspension

| Dilution         | Phylum                | Class                     | Order                   | Family                     | Genus                   | Relative abundance |
|------------------|-----------------------|---------------------------|-------------------------|----------------------------|-------------------------|--------------------|
| 10 <sup>-1</sup> | Other                 | Other                     | Other                   | Other                      | Other                   | 0.0984             |
| 10 <sup>-1</sup> | <i>Acidobacteria</i>  | Other                     | Other                   | Other                      | Other                   | 0.0003             |
| 10 <sup>-1</sup> | <i>Acidobacteria</i>  | <i>Acidobacteria_Gp1</i>  | <i>Gp1</i>              | Other                      | Other                   | 0.0063             |
| 10 <sup>-1</sup> | <i>Acidobacteria</i>  | <i>Acidobacteria_Gp10</i> | <i>Gp10</i>             | Other                      | Other                   | 0.0001             |
| 10 <sup>-1</sup> | <i>Acidobacteria</i>  | <i>Acidobacteria_Gp13</i> | <i>Gp13</i>             | Other                      | Other                   | 0.0001             |
| 10 <sup>-1</sup> | <i>Acidobacteria</i>  | <i>Acidobacteria_Gp16</i> | <i>Gp16</i>             | Other                      | Other                   | 0.0005             |
| 10 <sup>-1</sup> | <i>Acidobacteria</i>  | <i>Acidobacteria_Gp17</i> | <i>Gp17</i>             | Other                      | Other                   | 0.0007             |
| 10 <sup>-1</sup> | <i>Acidobacteria</i>  | <i>Acidobacteria_Gp2</i>  | <i>Gp2</i>              | Other                      | Other                   | 0.0012             |
| 10 <sup>-1</sup> | <i>Acidobacteria</i>  | <i>Acidobacteria_Gp3</i>  | <i>Gp3</i>              | Other                      | Other                   | 0.007              |
| 10 <sup>-1</sup> | <i>Acidobacteria</i>  | <i>Acidobacteria_Gp4</i>  | <i>Gp4</i>              | Other                      | Other                   | 0.0081             |
| 10 <sup>-1</sup> | <i>Acidobacteria</i>  | <i>Acidobacteria_Gp6</i>  | <i>Gp6</i>              | Other                      | Other                   | 0.0054             |
| 10 <sup>-1</sup> | <i>Acidobacteria</i>  | <i>Acidobacteria_Gp7</i>  | <i>Gp7</i>              | Other                      | Other                   | 0.0007             |
| 10 <sup>-1</sup> | <i>Actinobacteria</i> | <i>Actinobacteria</i>     | Other                   | Other                      | Other                   | 0.0093             |
| 10 <sup>-1</sup> | <i>Actinobacteria</i> | <i>Actinobacteria</i>     | <i>Acidimicrobiales</i> | Other                      | Other                   | 0.0013             |
| 10 <sup>-1</sup> | <i>Actinobacteria</i> | <i>Actinobacteria</i>     | <i>Actinomycetales</i>  | Other                      | Other                   | 0.02               |
| 10 <sup>-1</sup> | <i>Actinobacteria</i> | <i>Actinobacteria</i>     | <i>Actinomycetales</i>  | <i>Acid Othermaceae</i>    | <i>Acid Othermus</i>    | 0.0022             |
| 10 <sup>-1</sup> | <i>Actinobacteria</i> | <i>Actinobacteria</i>     | <i>Actinomycetales</i>  | <i>Catenulisporaceae</i>   | <i>Catenulispora</i>    | 0.0004             |
| 10 <sup>-1</sup> | <i>Actinobacteria</i> | <i>Actinobacteria</i>     | <i>Actinomycetales</i>  | <i>Cellulomonadaceae</i>   | <i>Cellulomonas</i>     | 0.0014             |
| 10 <sup>-1</sup> | <i>Actinobacteria</i> | <i>Actinobacteria</i>     | <i>Actinomycetales</i>  | <i>Cryptosporangiaceae</i> | <i>Cryptosporangium</i> | 0.0013             |
| 10 <sup>-1</sup> | <i>Actinobacteria</i> | <i>Actinobacteria</i>     | <i>Actinomycetales</i>  | <i>Geodermatophilaceae</i> | Other                   | 0.0013             |
| 10 <sup>-1</sup> | <i>Actinobacteria</i> | <i>Actinobacteria</i>     | <i>Actinomycetales</i>  | <i>Geodermatophilaceae</i> | <i>Modestobacter</i>    | 0.0001             |
| 10 <sup>-1</sup> | <i>Actinobacteria</i> | <i>Actinobacteria</i>     | <i>Actinomycetales</i>  | <i>Intrasporangiaceae</i>  | <i>Phycoccus</i>        | 0.0009             |
| 10 <sup>-1</sup> | <i>Actinobacteria</i> | <i>Actinobacteria</i>     | <i>Actinomycetales</i>  | <i>Kineosporiaceae</i>     | Other                   | 0.0004             |

|       |                       |                       |                        |                              |                          |        |
|-------|-----------------------|-----------------------|------------------------|------------------------------|--------------------------|--------|
| 10^-1 | <i>Actinobacteria</i> | <i>Actinobacteria</i> | <i>Actinomycetales</i> | <i>Microbacteriaceae</i>     | Other                    | 0.005  |
| 10^-1 | <i>Actinobacteria</i> | <i>Actinobacteria</i> | <i>Actinomycetales</i> | <i>Microbacteriaceae</i>     | <i>Leucobacter</i>       | 0.0001 |
| 10^-1 | <i>Actinobacteria</i> | <i>Actinobacteria</i> | <i>Actinomycetales</i> | <i>Micromonosporaceae</i>    | Other                    | 0.0134 |
| 10^-1 | <i>Actinobacteria</i> | <i>Actinobacteria</i> | <i>Actinomycetales</i> | <i>Micromonosporaceae</i>    | <i>Actinoplanes</i>      | 0.0005 |
| 10^-1 | <i>Actinobacteria</i> | <i>Actinobacteria</i> | <i>Actinomycetales</i> | <i>Micromonosporaceae</i>    | <i>Rugosimonospora</i>   | 0.0014 |
| 10^-1 | <i>Actinobacteria</i> | <i>Actinobacteria</i> | <i>Actinomycetales</i> | <i>Nakamurellaceae</i>       | <i>Humicoccus</i>        | 0.0016 |
| 10^-1 | <i>Actinobacteria</i> | <i>Actinobacteria</i> | <i>Actinomycetales</i> | <i>Nocardiaceae</i>          | <i>Nocardia</i>          | 0.0001 |
| 10^-1 | <i>Actinobacteria</i> | <i>Actinobacteria</i> | <i>Actinomycetales</i> | <i>Nocardiaceae</i>          | <i>Rhodococcus</i>       | 0.0003 |
| 10^-1 | <i>Actinobacteria</i> | <i>Actinobacteria</i> | <i>Actinomycetales</i> | <i>Nocardiodaceae</i>        | Other                    | 0.0017 |
| 10^-1 | <i>Actinobacteria</i> | <i>Actinobacteria</i> | <i>Actinomycetales</i> | <i>Nocardiodaceae</i>        | <i>Actinopolymorpha</i>  | 0.0003 |
| 10^-1 | <i>Actinobacteria</i> | <i>Actinobacteria</i> | <i>Actinomycetales</i> | <i>Nocardiodaceae</i>        | <i>Aeromicrobium</i>     | 0.0036 |
| 10^-1 | <i>Actinobacteria</i> | <i>Actinobacteria</i> | <i>Actinomycetales</i> | <i>Nocardiodaceae</i>        | <i>Kribbella</i>         | 0.0046 |
| 10^-1 | <i>Actinobacteria</i> | <i>Actinobacteria</i> | <i>Actinomycetales</i> | <i>Nocardiodaceae</i>        | <i>Nocardioides</i>      | 0.0009 |
| 10^-1 | <i>Actinobacteria</i> | <i>Actinobacteria</i> | <i>Actinomycetales</i> | <i>Promicromonosporaceae</i> | <i>Promicromonospora</i> | 0.0004 |
| 10^-1 | <i>Actinobacteria</i> | <i>Actinobacteria</i> | <i>Actinomycetales</i> | <i>Pseudonocardiaceae</i>    | Other                    | 0.0042 |
| 10^-1 | <i>Actinobacteria</i> | <i>Actinobacteria</i> | <i>Actinomycetales</i> | <i>Pseudonocardiaceae</i>    | <i>Amycolatopsis</i>     | 0.0096 |
| 10^-1 | <i>Actinobacteria</i> | <i>Actinobacteria</i> | <i>Actinomycetales</i> | <i>Pseudonocardiaceae</i>    | <i>Kutzneria</i>         | 0.0008 |
| 10^-1 | <i>Actinobacteria</i> | <i>Actinobacteria</i> | <i>Actinomycetales</i> | <i>Pseudonocardiaceae</i>    | <i>Pseudonocardia</i>    | 0.0104 |
| 10^-1 | <i>Actinobacteria</i> | <i>Actinobacteria</i> | <i>Actinomycetales</i> | <i>Streptosporangiaceae</i>  | Other                    | 0.0007 |
| 10^-1 | <i>Actinobacteria</i> | <i>Actinobacteria</i> | <i>Actinomycetales</i> | <i>Streptosporangiaceae</i>  | <i>Nonomuraea</i>        | 0.0004 |
| 10^-1 | <i>Actinobacteria</i> | <i>Actinobacteria</i> | <i>Actinomycetales</i> | <i>Streptosporangiaceae</i>  | <i>Streptosporangium</i> | 0.0001 |
| 10^-1 | <i>Actinobacteria</i> | <i>Actinobacteria</i> | <i>Actinomycetales</i> | <i>Thermomonosporaceae</i>   | Other                    | 0.0154 |

|       |                                |                        |                            |                             |                          |        |
|-------|--------------------------------|------------------------|----------------------------|-----------------------------|--------------------------|--------|
| 10^-1 | <i>Actinobacteria</i>          | <i>Actinobacteria</i>  | <i>Actinomycetales</i>     | <i>Thermomonosporaceae</i>  | <i>Actinoallomurus</i>   | 0.0091 |
| 10^-1 | <i>Actinobacteria</i>          | <i>Actinobacteria</i>  | <i>Solirubrobacterales</i> | Other                       | Other                    | 0.0043 |
| 10^-1 | <i>Actinobacteria</i>          | <i>Actinobacteria</i>  | <i>Solirubrobacterales</i> | <i>Conexibacteraceae</i>    | <i>Conexibacter</i>      | 0.0067 |
| 10^-1 | <i>Actinobacteria</i>          | <i>Actinobacteria</i>  | <i>Solirubrobacterales</i> | <i>Solirubrobacteraceae</i> | <i>Solirubrobacter</i>   | 0.0062 |
| 10^-1 | <i>Bacteria_incertae_sedis</i> | <i>Ktedonobacteria</i> | <i>Ktedonobacterales</i>   | <i>Ktedonobacteraceae</i>   | <i>Ktedonobacter</i>     | 0.0004 |
| 10^-1 | <i>Bacteroidetes</i>           | Other                  | Other                      | Other                       | Other                    | 0.0149 |
| 10^-1 | <i>Bacteroidetes</i>           | <i>Flavobacteria</i>   | <i>Flavobacteriales</i>    | <i>Cryomorphaceae</i>       | <i>Fluviicola</i>        | 0.0003 |
| 10^-1 | <i>Bacteroidetes</i>           | <i>Flavobacteria</i>   | <i>Flavobacteriales</i>    | <i>Flavobacteriaceae</i>    | Other                    | 0.0004 |
| 10^-1 | <i>Bacteroidetes</i>           | <i>Flavobacteria</i>   | <i>Flavobacteriales</i>    | <i>Flavobacteriaceae</i>    | <i>Chryseobacterium</i>  | 0.0003 |
| 10^-1 | <i>Bacteroidetes</i>           | <i>Flavobacteria</i>   | <i>Flavobacteriales</i>    | <i>Flavobacteriaceae</i>    | <i>Flavobacterium</i>    | 0.002  |
| 10^-1 | <i>Bacteroidetes</i>           | <i>Sphingobacteria</i> | <i>Sphingobacteriales</i>  | Other                       | Other                    | 0.0022 |
| 10^-1 | <i>Bacteroidetes</i>           | <i>Sphingobacteria</i> | <i>Sphingobacteriales</i>  | <i>Chitinophagaceae</i>     | Other                    | 0.0148 |
| 10^-1 | <i>Bacteroidetes</i>           | <i>Sphingobacteria</i> | <i>Sphingobacteriales</i>  | <i>Chitinophagaceae</i>     | <i>Ferruginibacter</i>   | 0.0012 |
| 10^-1 | <i>Bacteroidetes</i>           | <i>Sphingobacteria</i> | <i>Sphingobacteriales</i>  | <i>Chitinophagaceae</i>     | <i>Flavisolibacter</i>   | 0.0003 |
| 10^-1 | <i>Bacteroidetes</i>           | <i>Sphingobacteria</i> | <i>Sphingobacteriales</i>  | <i>Chitinophagaceae</i>     | <i>Sediminibacterium</i> | 0.0032 |
| 10^-1 | <i>Bacteroidetes</i>           | <i>Sphingobacteria</i> | <i>Sphingobacteriales</i>  | <i>Chitinophagaceae</i>     | <i>Terrimonas</i>        | 0.0012 |
| 10^-1 | <i>Bacteroidetes</i>           | <i>Sphingobacteria</i> | <i>Sphingobacteriales</i>  | <i>Cytophagaceae</i>        | Other                    | 0.0003 |
| 10^-1 | <i>Bacteroidetes</i>           | <i>Sphingobacteria</i> | <i>Sphingobacteriales</i>  | <i>Cytophagaceae</i>        | <i>Cytophaga</i>         | 0.0041 |
| 10^-1 | <i>Bacteroidetes</i>           | <i>Sphingobacteria</i> | <i>Sphingobacteriales</i>  | <i>Cytophagaceae</i>        | <i>Dyadobacter</i>       | 0.0005 |
| 10^-1 | <i>Bacteroidetes</i>           | <i>Sphingobacteria</i> | <i>Sphingobacteriales</i>  | <i>Cytophagaceae</i>        | <i>Spirosoma</i>         | 0.0005 |
| 10^-1 | <i>Bacteroidetes</i>           | <i>Sphingobacteria</i> | <i>Sphingobacteriales</i>  | <i>Sphingobacteriaceae</i>  | Other                    | 0.0001 |
| 10^-1 | <i>Bacteroidetes</i>           | <i>Sphingobacteria</i> | <i>Sphingobacteriales</i>  | <i>Sphingobacteriaceae</i>  | <i>Mucilaginibacter</i>  | 0.0014 |

|       |                         |                                     |                           |                            |                       |        |
|-------|-------------------------|-------------------------------------|---------------------------|----------------------------|-----------------------|--------|
| 10^-1 | <i>Bacteroidetes</i>    | <i>Sphingobacteria</i>              | <i>Sphingobacteriales</i> | <i>Sphingobacteriaceae</i> | <i>Pedobacter</i>     | 0.0004 |
| 10^-1 | <i>BRC1</i>             | <i>BRC1_genera_incertaine_sedis</i> | Other                     | Other                      | Other                 | 0.0003 |
| 10^-1 | <i>Chlamydiae</i>       | <i>Chlamydiae</i>                   | <i>Chlamydiales</i>       | Other                      | Other                 | 0.0008 |
| 10^-1 | <i>Chlamydiae</i>       | <i>Chlamydiae</i>                   | <i>Chlamydiales</i>       | <i>Parachlamydiaceae</i>   | Other                 | 0.0004 |
| 10^-1 | <i>Chlamydiae</i>       | <i>Chlamydiae</i>                   | <i>Chlamydiales</i>       | <i>Parachlamydiaceae</i>   | <i>Neochlamydia</i>   | 0.0001 |
| 10^-1 | <i>Chlamydiae</i>       | <i>Chlamydiae</i>                   | <i>Chlamydiales</i>       | <i>Simkaniaceae</i>        | <i>Simkania</i>       | 0.0003 |
| 10^-1 | <i>Chloroflexi</i>      | Other                               | Other                     | Other                      | Other                 | 0.0001 |
| 10^-1 | <i>Chloroflexi</i>      | <i>Anaerolineae</i>                 | <i>Anaerolineales</i>     | <i>Anaerolineaceae</i>     | Other                 | 0.0004 |
| 10^-1 | <i>Cyanobacteria</i>    | <i>Cyanobacteria</i>                | <i>Chloroplast</i>        | <i>Bacillariophyta</i>     | Other                 | 0.0001 |
| 10^-1 | <i>Cyanobacteria</i>    | <i>Cyanobacteria</i>                | <i>Chloroplast</i>        | <i>Chlorophyta</i>         | Other                 | 0.0004 |
| 10^-1 | <i>Cyanobacteria</i>    | <i>Cyanobacteria</i>                | <i>Family I</i>           | <i>GpI</i>                 | Other                 | 0.0001 |
| 10^-1 | <i>Cyanobacteria</i>    | <i>Cyanobacteria</i>                | <i>Family V</i>           | <i>GpV</i>                 | Other                 | 0.0001 |
| 10^-1 | <i>Firmicutes</i>       | <i>Bacilli</i>                      | <i>Bacillales</i>         | Other                      | Other                 | 0.0009 |
| 10^-1 | <i>Firmicutes</i>       | <i>Bacilli</i>                      | <i>Bacillales</i>         | <i>Bacillaceae</i>         | <i>Bacillus</i>       | 0.0003 |
| 10^-1 | <i>Firmicutes</i>       | <i>Bacilli</i>                      | <i>Bacillales</i>         | <i>Bacillaceae</i>         | <i>Oceanobacillus</i> | 0.0001 |
| 10^-1 | <i>Firmicutes</i>       | <i>Bacilli</i>                      | <i>Bacillales</i>         | <i>Paenibacillaceae</i>    | Other                 | 0.0001 |
| 10^-1 | <i>Firmicutes</i>       | <i>Bacilli</i>                      | <i>Bacillales</i>         | <i>Paenibacillaceae</i>    | <i>Ammoniphilus</i>   | 0.0001 |
| 10^-1 | <i>Firmicutes</i>       | <i>Bacilli</i>                      | <i>Bacillales</i>         | <i>Paenibacillaceae</i>    | <i>Cohnella</i>       | 0.0003 |
| 10^-1 | <i>Firmicutes</i>       | <i>Bacilli</i>                      | <i>Bacillales</i>         | <i>Paenibacillaceae</i>    | <i>Paenibacillus</i>  | 0.0011 |
| 10^-1 | <i>Firmicutes</i>       | <i>Clostridia</i>                   | <i>Clostridiales</i>      | Other                      | Other                 | 0.0003 |
| 10^-1 | <i>Gemmatimonadetes</i> | <i>Gemmatimonadetes</i>             | <i>Gemmatimonadales</i>   | <i>Gemmatimonadaceae</i>   | <i>Gemmatimonas</i>   | 0.0261 |
| 10^-1 | <i>Nitrospira</i>       | <i>Nitrospira</i>                   | <i>Nitrospirales</i>      | <i>Nitrospiraceae</i>      | <i>Nitrospira</i>     | 0.0029 |
| 10^-1 | <i>ODI</i>              | <i>ODI_genera_incertaine_sedis</i>  | Other                     | Other                      | Other                 | 0.0001 |
| 10^-1 | <i>OP10</i>             | <i>OP10_genera_incertaine_sedis</i> | Other                     | Other                      | Other                 | 0.0005 |
| 10^-1 | <i>Planctomycetes</i>   | <i>Planctomycetacia</i>             | <i>Planctomycetales</i>   | <i>Planctomycetaceae</i>   | Other                 | 0.0345 |

|       |                       |                            |                         |                            |                           |        |
|-------|-----------------------|----------------------------|-------------------------|----------------------------|---------------------------|--------|
| 10^-1 | <i>Planctomycetes</i> | <i>Planctomycetacia</i>    | <i>Planctomycetales</i> | <i>Planctomycetaceae</i>   | <i>Blastopirellula</i>    | 0.0001 |
| 10^-1 | <i>Planctomycetes</i> | <i>Planctomycetacia</i>    | <i>Planctomycetales</i> | <i>Planctomycetaceae</i>   | <i>Gemmata</i>            | 0.0033 |
| 10^-1 | <i>Planctomycetes</i> | <i>Planctomycetacia</i>    | <i>Planctomycetales</i> | <i>Planctomycetaceae</i>   | <i>Pirellula</i>          | 0.0044 |
| 10^-1 | <i>Planctomycetes</i> | <i>Planctomycetacia</i>    | <i>Planctomycetales</i> | <i>Planctomycetaceae</i>   | <i>Planctomyces</i>       | 0.0005 |
| 10^-1 | <i>Planctomycetes</i> | <i>Planctomycetacia</i>    | <i>Planctomycetales</i> | <i>Planctomycetaceae</i>   | <i>Schlesneria</i>        | 0.0005 |
| 10^-1 | <i>Planctomycetes</i> | <i>Planctomycetacia</i>    | <i>Planctomycetales</i> | <i>Planctomycetaceae</i>   | <i>Singulisphaera</i>     | 0.0032 |
| 10^-1 | <i>Planctomycetes</i> | <i>Planctomycetacia</i>    | <i>Planctomycetales</i> | <i>Planctomycetaceae</i>   | <i>Zavarzinella</i>       | 0.002  |
| 10^-1 | <i>Proteobacteria</i> | Other                      | Other                   | Other                      | Other                     | 0.0037 |
| 10^-1 | <i>Proteobacteria</i> | <i>Alphaproteobacteria</i> | Other                   | Other                      | Other                     | 0.0173 |
| 10^-1 | <i>Proteobacteria</i> | <i>Alphaproteobacteria</i> | <i>Caulobacterales</i>  | <i>Caulobacteraceae</i>    | Other                     | 0.0001 |
| 10^-1 | <i>Proteobacteria</i> | <i>Alphaproteobacteria</i> | <i>Caulobacterales</i>  | <i>Caulobacteraceae</i>    | <i>Asticcacaulis</i>      | 0.0005 |
| 10^-1 | <i>Proteobacteria</i> | <i>Alphaproteobacteria</i> | <i>Caulobacterales</i>  | <i>Caulobacteraceae</i>    | <i>Caulobacter</i>        | 0.0008 |
| 10^-1 | <i>Proteobacteria</i> | <i>Alphaproteobacteria</i> | <i>Caulobacterales</i>  | <i>Caulobacteraceae</i>    | <i>Phenylobacterium</i>   | 0.0041 |
| 10^-1 | <i>Proteobacteria</i> | <i>Alphaproteobacteria</i> | <i>Rhizobiales</i>      | Other                      | Other                     | 0.008  |
| 10^-1 | <i>Proteobacteria</i> | <i>Alphaproteobacteria</i> | <i>Rhizobiales</i>      | <i>Hyphomicrobiaceae</i>   | Other                     | 0.0025 |
| 10^-1 | <i>Proteobacteria</i> | <i>Alphaproteobacteria</i> | <i>Rhizobiales</i>      | <i>Hyphomicrobiaceae</i>   | <i>Devosia</i>            | 0.0001 |
| 10^-1 | <i>Proteobacteria</i> | <i>Alphaproteobacteria</i> | <i>Rhizobiales</i>      | <i>Hyphomicrobiaceae</i>   | <i>Hyphomicrobium</i>     | 0.0016 |
| 10^-1 | <i>Proteobacteria</i> | <i>Alphaproteobacteria</i> | <i>Rhizobiales</i>      | <i>Hyphomicrobiaceae</i>   | <i>Prosthecomicrobium</i> | 0.0001 |
| 10^-1 | <i>Proteobacteria</i> | <i>Alphaproteobacteria</i> | <i>Rhizobiales</i>      | <i>Methylobacteriaceae</i> | <i>Methylobacterium</i>   | 0.0003 |
| 10^-1 | <i>Proteobacteria</i> | <i>Alphaproteobacteria</i> | <i>Rhizobiales</i>      | <i>Methylobacteriaceae</i> | <i>Microvirga</i>         | 0.0004 |
| 10^-1 | <i>Proteobacteria</i> | <i>Alphaproteobacteria</i> | <i>Rhizobiales</i>      | <i>Phyllobacteriaceae</i>  | <i>Mesorhizobium</i>      | 0.0008 |
| 10^-1 | <i>Proteobacteria</i> | <i>Alphaproteobacteria</i> | <i>Rhizobiales</i>      | <i>Rhizobiaceae</i>        | <i>Rhizobium</i>          | 0.0003 |

|       |                       |                            |                          |                           |                       |        |
|-------|-----------------------|----------------------------|--------------------------|---------------------------|-----------------------|--------|
| 10^-1 | <i>Proteobacteria</i> | <i>Alphaproteobacteria</i> | <i>Rhizobiales</i>       | <i>Xanthobacteraceae</i>  | Other                 | 0.0001 |
| 10^-1 | <i>Proteobacteria</i> | <i>Alphaproteobacteria</i> | <i>Rhizobiales</i>       | <i>Xanthobacteraceae</i>  | <i>Labrys</i>         | 0.0004 |
| 10^-1 | <i>Proteobacteria</i> | <i>Alphaproteobacteria</i> | <i>Rhodospirillales</i>  | Other                     | Other                 | 0.0037 |
| 10^-1 | <i>Proteobacteria</i> | <i>Alphaproteobacteria</i> | <i>Rhodospirillales</i>  | <i>Acetobacteraceae</i>   | Other                 | 0.0022 |
| 10^-1 | <i>Proteobacteria</i> | <i>Alphaproteobacteria</i> | <i>Rhodospirillales</i>  | <i>Acetobacteraceae</i>   | <i>Acidisoma</i>      | 0.0005 |
| 10^-1 | <i>Proteobacteria</i> | <i>Alphaproteobacteria</i> | <i>Rhodospirillales</i>  | <i>Acetobacteraceae</i>   | <i>Roseomonas</i>     | 0.0001 |
| 10^-1 | <i>Proteobacteria</i> | <i>Alphaproteobacteria</i> | <i>Rhodospirillales</i>  | <i>Acetobacteraceae</i>   | <i>Stella</i>         | 0.0001 |
| 10^-1 | <i>Proteobacteria</i> | <i>Alphaproteobacteria</i> | <i>Rhodospirillales</i>  | <i>Rhodospirillaceae</i>  | Other                 | 0.0004 |
| 10^-1 | <i>Proteobacteria</i> | <i>Alphaproteobacteria</i> | <i>Rhodospirillales</i>  | <i>Rhodospirillaceae</i>  | <i>Inquilinus</i>     | 0.0001 |
| 10^-1 | <i>Proteobacteria</i> | <i>Alphaproteobacteria</i> | <i>Sphingomonadales</i>  | <i>Erythrobacteraceae</i> | Other                 | 0.0003 |
| 10^-1 | <i>Proteobacteria</i> | <i>Alphaproteobacteria</i> | <i>Sphingomonadales</i>  | <i>Erythrobacteraceae</i> | <i>Porphyrobacter</i> | 0.0001 |
| 10^-1 | <i>Proteobacteria</i> | <i>Alphaproteobacteria</i> | <i>Sphingomonadales</i>  | <i>Sphingomonadaceae</i>  | Other                 | 0.0013 |
| 10^-1 | <i>Proteobacteria</i> | <i>Alphaproteobacteria</i> | <i>Sphingomonadales</i>  | <i>Sphingomonadaceae</i>  | <i>Sphingomonas</i>   | 0.0005 |
| 10^-1 | <i>Proteobacteria</i> | <i>Betaproteobacteria</i>  | Other                    | Other                     | Other                 | 0.004  |
| 10^-1 | <i>Proteobacteria</i> | <i>Betaproteobacteria</i>  | <i>Burkholderiales</i>   | <i>Burkholderiaceae</i>   | <i>Burkholderia</i>   | 0.0007 |
| 10^-1 | <i>Proteobacteria</i> | <i>Betaproteobacteria</i>  | <i>Burkholderiales</i>   | <i>Comamonadaceae</i>     | Other                 | 0.0034 |
| 10^-1 | <i>Proteobacteria</i> | <i>Betaproteobacteria</i>  | <i>Burkholderiales</i>   | <i>Oxalobacteraceae</i>   | Other                 | 0.0003 |
| 10^-1 | <i>Proteobacteria</i> | <i>Betaproteobacteria</i>  | <i>Methylophilales</i>   | <i>Methylophilaceae</i>   | <i>Methylophilus</i>  | 0.0003 |
| 10^-1 | <i>Proteobacteria</i> | <i>Betaproteobacteria</i>  | <i>Rhodocyclales</i>     | <i>Rhodocyclaceae</i>     | Other                 | 0.0001 |
| 10^-1 | <i>Proteobacteria</i> | <i>Deltaproteobacteria</i> | Other                    | Other                     | Other                 | 0.005  |
| 10^-1 | <i>Proteobacteria</i> | <i>Deltaproteobacteria</i> | <i>Bdellovibrionales</i> | <i>Bacteriovoraceae</i>   | <i>Peredibacter</i>   | 0.0001 |
| 10^-1 | <i>Proteobacteria</i> | <i>Deltaproteobacteria</i> | <i>Bdellovibrionales</i> | <i>Bdellovibrionaceae</i> | <i>Bdellovibrio</i>   | 0.0003 |
| 10^-1 | <i>Proteobacteria</i> | <i>Deltaproteobacteria</i> | <i>Myxococcales</i>      | Other                     | Other                 | 0.0062 |
| 10^-1 | <i>Proteobacteria</i> | <i>Deltaproteobacteria</i> | <i>Myxococcales</i>      | <i>Cystobacteraceae</i>   | Other                 | 0.0007 |
| 10^-1 | <i>Proteobacteria</i> | <i>Deltaproteobacteria</i> | <i>Myxococcales</i>      | <i>Myxococcaceae</i>      | <i>Corallococcus</i>  | 0.0007 |

|       |                        |                            |                                             |                            |                         |        |
|-------|------------------------|----------------------------|---------------------------------------------|----------------------------|-------------------------|--------|
| 10^-1 | <i>Proteobacteria</i>  | <i>Deltaproteobacteria</i> | <i>Myxococcales</i>                         | <i>Polyangiaceae</i>       | Other                   | 0.0034 |
| 10^-1 | <i>Proteobacteria</i>  | <i>Deltaproteobacteria</i> | <i>Myxococcales</i>                         | <i>Polyangiaceae</i>       | <i>Byssovorax</i>       | 0.0017 |
| 10^-1 | <i>Proteobacteria</i>  | <i>Deltaproteobacteria</i> | <i>Myxococcales</i>                         | <i>Polyangiaceae</i>       | <i>Chondromyces</i>     | 0.0011 |
| 10^-1 | <i>Proteobacteria</i>  | <i>Gammaproteobacteria</i> | Other                                       | Other                      | Other                   | 0.0034 |
| 10^-1 | <i>Proteobacteria</i>  | <i>Gammaproteobacteria</i> | <i>Pseudomonadales</i>                      | <i>Moraxellaceae</i>       | <i>Alkanindiges</i>     | 0.0004 |
| 10^-1 | <i>Proteobacteria</i>  | <i>Gammaproteobacteria</i> | <i>Pseudomonadales</i>                      | <i>Pseudomonadaceae</i>    | <i>Cellvibrio</i>       | 0.0008 |
| 10^-1 | <i>Proteobacteria</i>  | <i>Gammaproteobacteria</i> | <i>Xanthomonadales</i>                      | <i>Sinobacteraceae</i>     | <i>Alkanibacter</i>     | 0.0011 |
| 10^-1 | <i>Proteobacteria</i>  | <i>Gammaproteobacteria</i> | <i>Xanthomonadales</i>                      | <i>Sinobacteraceae</i>     | <i>Nevskia</i>          | 0.0003 |
| 10^-1 | <i>Proteobacteria</i>  | <i>Gammaproteobacteria</i> | <i>Xanthomonadales</i>                      | <i>Sinobacteraceae</i>     | <i>Steroidobacter</i>   | 0.0011 |
| 10^-1 | <i>Proteobacteria</i>  | <i>Gammaproteobacteria</i> | <i>Xanthomonadales</i>                      | <i>Xanthomonadaceae</i>    | Other                   | 0.0092 |
| 10^-1 | <i>Verrucomicrobia</i> | Other                      | Other                                       | Other                      | Other                   | 0.0047 |
| 10^-1 | <i>Verrucomicrobia</i> | <i>Opitutae</i>            | <i>Opitales</i>                             | <i>Opitutaceae</i>         | Other                   | 0.0018 |
| 10^-1 | <i>Verrucomicrobia</i> | <i>Opitutae</i>            | <i>Opitales</i>                             | <i>Opitutaceae</i>         | <i>Opitutus</i>         | 0.0084 |
| 10^-1 | <i>Verrucomicrobia</i> | <i>Spartobacteria</i>      | Other                                       | Other                      | Other                   | 0.0007 |
| 10^-1 | <i>Verrucomicrobia</i> | <i>Spartobacteria</i>      | <i>Spartobacteria_genera_incertae_sedis</i> | Other                      | Other                   | 0.0061 |
| 10^-1 | <i>Verrucomicrobia</i> | <i>Subdivision3</i>        | <i>Subdivision3_genera_incertae_sedis</i>   | Other                      | Other                   | 0.005  |
| 10^-1 | <i>Verrucomicrobia</i> | <i>Verrucomicrobiae</i>    | <i>Verrucomicrobiales</i>                   | <i>Verrucomicrobiaceae</i> | Other                   | 0.0013 |
| 10^-1 | <i>Verrucomicrobia</i> | <i>Verrucomicrobiae</i>    | <i>Verrucomicrobiales</i>                   | <i>Verrucomicrobiaceae</i> | <i>Prostheco bacter</i> | 0.0005 |
| 10^-1 | <i>Verrucomicrobia</i> | <i>Verrucomicrobiae</i>    | <i>Verrucomicrobiales</i>                   | <i>Verrucomicrobiaceae</i> | <i>Verrucomicrobium</i> | 0.0001 |
| 10^-6 | Other                  | Other                      | Other                                       | Other                      | Other                   | 0.0258 |
| 10^-6 | <i>Acidobacteria</i>   | Other                      | Other                                       | Other                      | Other                   | 0.0001 |
| 10^-6 | <i>Acidobacteria</i>   | <i>Acidobacteria_Gp1</i>   | <i>Gp1</i>                                  | Other                      | Other                   | 0.0022 |
| 10^-6 | <i>Acidobacteria</i>   | <i>Acidobacteria_Gp3</i>   | <i>Gp3</i>                                  | Other                      | Other                   | 0.0013 |

|       |                       |                            |                           |                            |                          |        |
|-------|-----------------------|----------------------------|---------------------------|----------------------------|--------------------------|--------|
| 10^-6 | <i>Acidobacteria</i>  | <i>Acidobacteria_Gp4</i>   | <i>Gp4</i>                | Other                      | Other                    | 0.0014 |
| 10^-6 | <i>Acidobacteria</i>  | <i>Acidobacteria_Gp6</i>   | <i>Gp6</i>                | Other                      | Other                    | 0.0007 |
| 10^-6 | <i>Bacteroidetes</i>  | Other                      | Other                     | Other                      | Other                    | 0.0026 |
| 10^-6 | <i>Bacteroidetes</i>  | <i>Flavobacteria</i>       | <i>Flavobacteriales</i>   | <i>Flavobacteriaceae</i>   | <i>Flavobacterium</i>    | 0.0001 |
| 10^-6 | <i>Bacteroidetes</i>  | <i>Sphingobacteria</i>     | <i>Sphingobacteriales</i> | <i>Chitinophagaceae</i>    | Other                    | 0.006  |
| 10^-6 | <i>Bacteroidetes</i>  | <i>Sphingobacteria</i>     | <i>Sphingobacteriales</i> | <i>Sphingobacteriaceae</i> | <i>Pedobacter</i>        | 0.0001 |
| 10^-6 | <i>Cyanobacteria</i>  | <i>Cyanobacteria</i>       | <i>Chloroplast</i>        | <i>Bacillariophyta</i>     | Other                    | 0.0025 |
| 10^-6 | <i>Firmicutes</i>     | <i>Bacilli</i>             | <i>Bacillales</i>         | <i>Paenibacillaceae</i>    | <i>Paenibacillus</i>     | 0.0022 |
| 10^-6 | <i>Firmicutes</i>     | <i>Bacilli</i>             | <i>Lactobacillales</i>    | Other                      | Other                    | 0.0004 |
| 10^-6 | <i>Firmicutes</i>     | <i>Bacilli</i>             | <i>Lactobacillales</i>    | <i>Aerococcaceae</i>       | <i>Aerococcus</i>        | 0.0003 |
| 10^-6 | <i>Firmicutes</i>     | <i>Bacilli</i>             | <i>Lactobacillales</i>    | <i>Lactobacillaceae</i>    | <i>Lactobacillus</i>     | 0.0013 |
| 10^-6 | <i>Firmicutes</i>     | <i>Bacilli</i>             | <i>Lactobacillales</i>    | <i>Streptococcaceae</i>    | <i>Lactococcus</i>       | 0.0014 |
| 10^-6 | <i>Firmicutes</i>     | <i>Bacilli</i>             | <i>Lactobacillales</i>    | <i>Streptococcaceae</i>    | <i>Streptococcus</i>     | 0.0007 |
| 10^-6 | <i>Firmicutes</i>     | <i>Clostridia</i>          | <i>Clostridiales</i>      | <i>Veillonellaceae</i>     | <i>Veillonella</i>       | 0.0003 |
| 10^-6 | <i>Planctomycetes</i> | <i>Planctomycetacia</i>    | <i>Planctomycetales</i>   | <i>Planctomycetaceae</i>   | Other                    | 0.0007 |
| 10^-6 | <i>Planctomycetes</i> | <i>Planctomycetacia</i>    | <i>Planctomycetales</i>   | <i>Planctomycetaceae</i>   | <i>Pirellula</i>         | 0.0017 |
| 10^-6 | <i>Planctomycetes</i> | <i>Planctomycetacia</i>    | <i>Planctomycetales</i>   | <i>Planctomycetaceae</i>   | <i>Singulisphaera</i>    | 0.0004 |
| 10^-6 | <i>Proteobacteria</i> | Other                      | Other                     | Other                      | Other                    | 0.0033 |
| 10^-6 | <i>Proteobacteria</i> | <i>Alphaproteobacteria</i> | Other                     | Other                      | Other                    | 0.0001 |
| 10^-6 | <i>Proteobacteria</i> | <i>Alphaproteobacteria</i> | <i>Rhizobiales</i>        | Other                      | Other                    | 0.0005 |
| 10^-6 | <i>Proteobacteria</i> | <i>Alphaproteobacteria</i> | <i>Rhizobiales</i>        | <i>Bradyrhizobiaceae</i>   | Other                    | 0.0004 |
| 10^-6 | <i>Proteobacteria</i> | <i>Alphaproteobacteria</i> | <i>Rhizobiales</i>        | <i>Brucellaceae</i>        | <i>Pseudochrobactrum</i> | 0.0003 |
| 10^-6 | <i>Proteobacteria</i> | <i>Alphaproteobacteria</i> | <i>Rhizobiales</i>        | <i>Rhizobiaceae</i>        | <i>Rhizobium</i>         | 0.0001 |
| 10^-6 | <i>Proteobacteria</i> | <i>Alphaproteobacteria</i> | <i>Rhodospirillales</i>   | <i>Acetobacteraceae</i>    | Other                    | 0.001  |
| 10^-6 | <i>Proteobacteria</i> | <i>Betaproteobacteria</i>  | <i>Burkholderiales</i>    | <i>Alcaligenaceae</i>      | Other                    | 0.0004 |



|                  |                        |                                  |                                             |                            |                          |        |
|------------------|------------------------|----------------------------------|---------------------------------------------|----------------------------|--------------------------|--------|
| 10 <sup>-6</sup> | <i>Proteobacteria</i>  | <i>Betaproteobacteria</i>        | <i>Burkholderiales</i>                      | <i>Oxalobacteraceae</i>    | <i>Janthinobacterium</i> | 0.0001 |
| 10 <sup>-6</sup> | <i>Proteobacteria</i>  | <i>Deltaproteobacteria</i>       | Other                                       | Other                      | Other                    | 0.0001 |
| 10 <sup>-6</sup> | <i>Proteobacteria</i>  | <i>Gammaproteobacteria</i>       | Other                                       | Other                      | Other                    | 0.0012 |
| 10 <sup>-6</sup> | <i>Proteobacteria</i>  | <i>Gammaproteobacteria</i>       | <i>Enterobacteriales</i>                    | <i>Enterobacteriaceae</i>  | Other                    | 0.0005 |
| 10 <sup>-6</sup> | <i>Proteobacteria</i>  | <i>Gammaproteobacteria</i>       | <i>Pseudomonadales</i>                      | <i>Pseudomonadaceae</i>    | Other                    | 0.0001 |
| 10 <sup>-6</sup> | <i>Proteobacteria</i>  | <i>Gammaproteobacteria</i>       | <i>Xanthomonadales</i>                      | <i>Xanthomonadaceae</i>    | <i>Dyella</i>            | 0.0001 |
| 10 <sup>-6</sup> | <i>Proteobacteria</i>  | <i>Gammaproteobacteria</i>       | <i>Xanthomonadales</i>                      | <i>Xanthomonadaceae</i>    | <i>Stenotrophomonas</i>  | 0.0004 |
| 10 <sup>-6</sup> | <i>TM7</i>             | <i>TM7_genera_incertae_sedis</i> | Other                                       | Other                      | Other                    | 0.0001 |
| 10 <sup>-6</sup> | <i>Verrucomicrobia</i> | <i>Spartobacteria</i>            | <i>Spartobacteria_genera_incertae_sedis</i> | Other                      | Other                    | 0.0003 |
| 10 <sup>-9</sup> | <i>Actinobacteria</i>  | <i>Actinobacteria</i>            | <i>Actinomycetales</i>                      | <i>Dermacoccaceae</i>      | <i>Dermacoccus</i>       | 0.0004 |
| 10 <sup>-9</sup> | <i>Firmicutes</i>      | <i>Bacilli</i>                   | <i>Lactobacillales</i>                      | <i>Enterococcaceae</i>     | <i>Vagococcus</i>        | 0.0003 |
| 10 <sup>-9</sup> | <i>Firmicutes</i>      | <i>Erysipelotrichi</i>           | <i>Erysipelotrichales</i>                   | <i>Erysipelotrichaceae</i> | <i>Turicibacter</i>      | 0.0001 |
| 10 <sup>-9</sup> | <i>Proteobacteria</i>  | <i>Alphaproteobacteria</i>       | <i>Rhizobiales</i>                          | <i>Methylobacteriaceae</i> | <i>Methylobacterium</i>  | 0.0003 |
| 10 <sup>-9</sup> | <i>Proteobacteria</i>  | <i>Alphaproteobacteria</i>       | <i>Sphingomonadales</i>                     | <i>Sphingomonadaceae</i>   | <i>Sphingopyxis</i>      | 0.0001 |
| 10 <sup>-9</sup> | <i>Proteobacteria</i>  | <i>Alphaproteobacteria</i>       | <i>Sphingomonadales</i>                     | <i>Sphingomonadaceae</i>   | <i>Sphingopyxis</i>      | 0.0004 |
| 10 <sup>-9</sup> | <i>Proteobacteria</i>  | <i>Betaproteobacteria</i>        | <i>Burkholderiales</i>                      | <i>Alcaligenaceae</i>      | <i>Alcaligenes</i>       | 0.005  |
| 10 <sup>-9</sup> | <i>Proteobacteria</i>  | <i>Betaproteobacteria</i>        | <i>Burkholderiales</i>                      | <i>Oxalobacteraceae</i>    | <i>Herbaspirillum</i>    | 0.0012 |
| 10 <sup>-9</sup> | <i>Proteobacteria</i>  | <i>Gammaproteobacteria</i>       | <i>Pseudomonadales</i>                      | <i>Pseudomonadaceae</i>    | <i>Pseudomonas</i>       | 0.0001 |
| 10 <sup>-9</sup> | <i>Verrucomicrobia</i> | <i>Opitutae</i>                  | <i>Opitutales</i>                           | <i>Opitutaceae</i>         | <i>Opitutus</i>          | 0.0001 |

Table S2. The phylogenetic affiliation of the unique OTUs in the soil samples after incubation of three dilutions of a soil suspension

| Dilution         | Phylum                | Class                    | Order                      | Family                     | Genus                   | Relative abundance |
|------------------|-----------------------|--------------------------|----------------------------|----------------------------|-------------------------|--------------------|
| 10 <sup>-1</sup> | Other                 | Other                    | Other                      | Other                      | Other                   | 0.1403             |
| 10 <sup>-1</sup> | <i>Acidobacteria</i>  | Other                    | Other                      | Other                      | Other                   | 0.0002             |
| 10 <sup>-1</sup> | <i>Acidobacteria</i>  | <i>Acidobacteria_Gp1</i> | <i>Gp1</i>                 | Other                      | Other                   | 0.0031             |
| 10 <sup>-1</sup> | <i>Acidobacteria</i>  | <i>Acidobacteria_Gp3</i> | <i>Gp3</i>                 | Other                      | Other                   | 0.0072             |
| 10 <sup>-1</sup> | <i>Acidobacteria</i>  | <i>Acidobacteria_Gp4</i> | <i>Gp4</i>                 | Other                      | Other                   | 0.0346             |
| 10 <sup>-1</sup> | <i>Acidobacteria</i>  | <i>Acidobacteria_Gp6</i> | <i>Gp6</i>                 | Other                      | Other                   | 0.0128             |
| 10 <sup>-1</sup> | <i>Acidobacteria</i>  | <i>Acidobacteria_Gp7</i> | <i>Gp7</i>                 | Other                      | Other                   | 0.0002             |
| 10 <sup>-1</sup> | <i>Actinobacteria</i> | <i>Actinobacteria</i>    | Other                      | Other                      | Other                   | 0.0032             |
| 10 <sup>-1</sup> | <i>Actinobacteria</i> | <i>Actinobacteria</i>    | <i>Actinomycetales</i>     | Other                      | Other                   | 0.0050             |
| 10 <sup>-1</sup> | <i>Actinobacteria</i> | <i>Actinobacteria</i>    | <i>Actinomycetales</i>     | <i>Cryptosporangiaceae</i> | <i>Cryptosporangium</i> | 0.0001             |
| 10 <sup>-1</sup> | <i>Actinobacteria</i> | <i>Actinobacteria</i>    | <i>Actinomycetales</i>     | <i>Geodermatophilaceae</i> | Other                   | 0.0003             |
| 10 <sup>-1</sup> | <i>Actinobacteria</i> | <i>Actinobacteria</i>    | <i>Actinomycetales</i>     | <i>Micrococcaceae</i>      | <i>Arthrobacter</i>     | 0.0094             |
| 10 <sup>-1</sup> | <i>Actinobacteria</i> | <i>Actinobacteria</i>    | <i>Actinomycetales</i>     | <i>Micromonosporaceae</i>  | Other                   | 0.0021             |
| 10 <sup>-1</sup> | <i>Actinobacteria</i> | <i>Actinobacteria</i>    | <i>Actinomycetales</i>     | <i>Nocardiaceae</i>        | <i>Nocardia</i>         | 0.0003             |
| 10 <sup>-1</sup> | <i>Actinobacteria</i> | <i>Actinobacteria</i>    | <i>Actinomycetales</i>     | <i>Nocardioidaceae</i>     | Other                   | 0.0004             |
| 10 <sup>-1</sup> | <i>Actinobacteria</i> | <i>Actinobacteria</i>    | <i>Actinomycetales</i>     | <i>Pseudonocardiaceae</i>  | Other                   | 0.0013             |
| 10 <sup>-1</sup> | <i>Actinobacteria</i> | <i>Actinobacteria</i>    | <i>Actinomycetales</i>     | <i>Pseudonocardiaceae</i>  | <i>Amycolatopsis</i>    | 0.0002             |
| 10 <sup>-1</sup> | <i>Actinobacteria</i> | <i>Actinobacteria</i>    | <i>Solirubrobacterales</i> | Other                      | Other                   | 0.0044             |
| 10 <sup>-1</sup> | <i>Actinobacteria</i> | <i>Actinobacteria</i>    | <i>Solirubrobacterales</i> | <i>Conexibacteraceae</i>   | <i>Conexibacter</i>     | 0.0055             |
| 10 <sup>-1</sup> | <i>Bacteroidetes</i>  | Other                    | Other                      | Other                      | Other                   | 0.0459             |
| 10 <sup>-1</sup> | <i>Bacteroidetes</i>  | <i>Sphingobacteria</i>   | <i>Sphingobacteriales</i>  | Other                      | Other                   | 0.0128             |
| 10 <sup>-1</sup> | <i>Bacteroidetes</i>  | <i>Sphingobacteria</i>   | <i>Sphingobacteriales</i>  | <i>Chitinophagaceae</i>    | Other                   | 0.0553             |
| 10 <sup>-1</sup> | <i>Bacteroidetes</i>  | <i>Sphingobacteria</i>   | <i>Sphingobacteriales</i>  | <i>Chitinophagaceae</i>    | <i>Ferruginibacter</i>  | 0.0014             |
| 10 <sup>-1</sup> | <i>Bacteroidetes</i>  | <i>Sphingobacteria</i>   | <i>Sphingobacteriales</i>  | <i>Chitinophagaceae</i>    | <i>Flavisolibacter</i>  | 0.0001             |

|                  |                         |                                   |                           |                          |                       |        |
|------------------|-------------------------|-----------------------------------|---------------------------|--------------------------|-----------------------|--------|
| 10 <sup>-1</sup> | <i>Bacteroidetes</i>    | <i>Sphingobacteria</i>            | <i>Sphingobacteriales</i> | <i>Chitinophagaceae</i>  | <i>Terrimonas</i>     | 0.0085 |
| 10 <sup>-1</sup> | <i>Bacteroidetes</i>    | <i>Sphingobacteria</i>            | <i>Sphingobacteriales</i> | <i>Cytophagaceae</i>     | Other                 | 0.0002 |
| 10 <sup>-1</sup> | <i>Bacteroidetes</i>    | <i>Sphingobacteria</i>            | <i>Sphingobacteriales</i> | <i>Cytophagaceae</i>     | <i>Larkinella</i>     | 0.0001 |
| 10 <sup>-1</sup> | <i>BRC1</i>             | <i>BRC1_genera_incertae_sedis</i> | Other                     | Other                    | Other                 | 0.0009 |
| 10 <sup>-1</sup> | <i>Chlamydiae</i>       | <i>Chlamydiae</i>                 | <i>Chlamydiales</i>       | Other                    | Other                 | 0.0008 |
| 10 <sup>-1</sup> | <i>Chlamydiae</i>       | <i>Chlamydiae</i>                 | <i>Chlamydiales</i>       | <i>Parachlamydiaceae</i> | Other                 | 0.0023 |
| 10 <sup>-1</sup> | <i>Chloroflexi</i>      | Other                             | Other                     | Other                    | Other                 | 0.0003 |
| 10 <sup>-1</sup> | <i>Chloroflexi</i>      | <i>Anaerolineae</i>               | <i>Anaerolineales</i>     | <i>Anaerolineaceae</i>   | Other                 | 0.0007 |
| 10 <sup>-1</sup> | <i>Chloroflexi</i>      | <i>Caldilineae</i>                | <i>Caldilineales</i>      | <i>Caldilineaceae</i>    | <i>Caldilinea</i>     | 0.0004 |
| 10 <sup>-1</sup> | <i>Cyanobacteria</i>    | <i>Cyanobacteria</i>              | <i>Chloroplast</i>        | Other                    | Other                 | 0.0007 |
| 10 <sup>-1</sup> | <i>Firmicutes</i>       | <i>Bacilli</i>                    | <i>Bacillales</i>         | Other                    | Other                 | 0.0122 |
| 10 <sup>-1</sup> | <i>Firmicutes</i>       | <i>Bacilli</i>                    | <i>Bacillales</i>         | <i>Bacillaceae</i>       | Other                 | 0.0124 |
| 10 <sup>-1</sup> | <i>Firmicutes</i>       | <i>Bacilli</i>                    | <i>Bacillales</i>         | <i>Bacillaceae</i>       | <i>Bacillus</i>       | 0.0007 |
| 10 <sup>-1</sup> | <i>Firmicutes</i>       | <i>Bacilli</i>                    | <i>Bacillales</i>         | <i>Bacillaceae</i>       | <i>Oceanobacillus</i> | 0.0002 |
| 10 <sup>-1</sup> | <i>Firmicutes</i>       | <i>Bacilli</i>                    | <i>Bacillales</i>         | <i>Bacillaceae</i>       | <i>Tumebacillus</i>   | 0.0001 |
| 10 <sup>-1</sup> | <i>Firmicutes</i>       | <i>Bacilli</i>                    | <i>Bacillales</i>         | <i>Staphylococcaceae</i> | <i>Staphylococcus</i> | 0.0001 |
| 10 <sup>-1</sup> | <i>Firmicutes</i>       | <i>Clostridia</i>                 | <i>Clostridiales</i>      | <i>Ruminococcaceae</i>   | Other                 | 0.0001 |
| 10 <sup>-1</sup> | <i>Gemmatimonadetes</i> | <i>Gemmatimonadetes</i>           | <i>Gemmatimonadales</i>   | <i>Gemmatimonadaceae</i> | <i>Gemmatimonas</i>   | 0.0251 |
| 10 <sup>-1</sup> | <i>Nitrospira</i>       | <i>Nitrospira</i>                 | <i>Nitrospirales</i>      | <i>Nitrospiraceae</i>    | <i>Nitrospira</i>     | 0.0016 |
| 10 <sup>-1</sup> | <i>OD1</i>              | <i>OD1_genera_incertae_sedis</i>  | Other                     | Other                    | Other                 | 0.0016 |
| 10 <sup>-1</sup> | <i>Planctomycetes</i>   | <i>Planctomycetacia</i>           | <i>Planctomycetales</i>   | <i>Planctomycetaceae</i> | Other                 | 0.0564 |
| 10 <sup>-1</sup> | <i>Planctomycetes</i>   | <i>Planctomycetacia</i>           | <i>Planctomycetales</i>   | <i>Planctomycetaceae</i> | <i>Gemmata</i>        | 0.0089 |
| 10 <sup>-1</sup> | <i>Planctomycetes</i>   | <i>Planctomycetacia</i>           | <i>Planctomycetales</i>   | <i>Planctomycetaceae</i> | <i>Pirellula</i>      | 0.0101 |
| 10 <sup>-1</sup> | <i>Planctomycetes</i>   | <i>Planctomycetacia</i>           | <i>Planctomycetales</i>   | <i>Planctomycetaceae</i> | <i>Planctomyces</i>   | 0.0080 |
| 10 <sup>-1</sup> | <i>Planctomycetes</i>   | <i>Planctomycetacia</i>           | <i>Planctomycetales</i>   | <i>Planctomycetaceae</i> | <i>Singulisphaera</i> | 0.0068 |
| 10 <sup>-1</sup> | <i>Planctomycetes</i>   | <i>Planctomycetacia</i>           | <i>Planctomycetales</i>   | <i>Planctomycetaceae</i> | <i>Zavarzinella</i>   | 0.0012 |
| 10 <sup>-1</sup> | <i>Proteobacteria</i>   | Other                             | Other                     | Other                    | Other                 | 0.0172 |

|                  |                       |                            |                          |                            |                         |        |
|------------------|-----------------------|----------------------------|--------------------------|----------------------------|-------------------------|--------|
| 10 <sup>-1</sup> | <i>Proteobacteria</i> | <i>Alphaproteobacteria</i> | Other                    | Other                      | Other                   | 0.0707 |
| 10 <sup>-1</sup> | <i>Proteobacteria</i> | <i>Alphaproteobacteria</i> | <i>Caulobacterales</i>   | <i>Caulobacteraceae</i>    | Other                   | 0.0039 |
| 10 <sup>-1</sup> | <i>Proteobacteria</i> | <i>Alphaproteobacteria</i> | <i>Caulobacterales</i>   | <i>Caulobacteraceae</i>    | <i>Phenylobacterium</i> | 0.0048 |
| 10 <sup>-1</sup> | <i>Proteobacteria</i> | <i>Alphaproteobacteria</i> | <i>Rhizobiales</i>       | Other                      | Other                   | 0.0288 |
| 10 <sup>-1</sup> | <i>Proteobacteria</i> | <i>Alphaproteobacteria</i> | <i>Rhizobiales</i>       | <i>Bradyrhizobiaceae</i>   | Other                   | 0.0002 |
| 10 <sup>-1</sup> | <i>Proteobacteria</i> | <i>Alphaproteobacteria</i> | <i>Rhizobiales</i>       | <i>Hyphomicrobiaceae</i>   | <i>Devosia</i>          | 0.0148 |
| 10 <sup>-1</sup> | <i>Proteobacteria</i> | <i>Alphaproteobacteria</i> | <i>Rhizobiales</i>       | <i>Hyphomicrobiaceae</i>   | <i>Hyphomicrobium</i>   | 0.0024 |
| 10 <sup>-1</sup> | <i>Proteobacteria</i> | <i>Alphaproteobacteria</i> | <i>Rhizobiales</i>       | <i>Methylobacteriaceae</i> | <i>Microvirga</i>       | 0.0008 |
| 10 <sup>-1</sup> | <i>Proteobacteria</i> | <i>Alphaproteobacteria</i> | <i>Rhodospirillales</i>  | Other                      | Other                   | 0.0058 |
| 10 <sup>-1</sup> | <i>Proteobacteria</i> | <i>Alphaproteobacteria</i> | <i>Rhodospirillales</i>  | <i>Acetobacteraceae</i>    | <i>Stella</i>           | 0.0002 |
| 10 <sup>-1</sup> | <i>Proteobacteria</i> | <i>Alphaproteobacteria</i> | <i>Rhodospirillales</i>  | <i>Rhodospirillaceae</i>   | Other                   | 0.0004 |
| 10 <sup>-1</sup> | <i>Proteobacteria</i> | <i>Alphaproteobacteria</i> | <i>Rhodospirillales</i>  | <i>Rhodospirillaceae</i>   | <i>Inquilinus</i>       | 0.0001 |
| 10 <sup>-1</sup> | <i>Proteobacteria</i> | <i>Alphaproteobacteria</i> | <i>Rickettsiales</i>     | <i>Rickettsiaceae</i>      | <i>Rickettsia</i>       | 0.0006 |
| 10 <sup>-1</sup> | <i>Proteobacteria</i> | <i>Alphaproteobacteria</i> | <i>Sphingomonadales</i>  | <i>Erythrobacteraceae</i>  | <i>Porphyrobacter</i>   | 0.0003 |
| 10 <sup>-1</sup> | <i>Proteobacteria</i> | <i>Betaproteobacteria</i>  | Other                    | Other                      | Other                   | 0.0057 |
| 10 <sup>-1</sup> | <i>Proteobacteria</i> | <i>Betaproteobacteria</i>  | <i>Burkholderiales</i>   | <i>Burkholderiaceae</i>    | <i>Burkholderia</i>     | 0.0044 |
| 10 <sup>-1</sup> | <i>Proteobacteria</i> | <i>Deltaproteobacteria</i> | Other                    | Other                      | Other                   | 0.0019 |
| 10 <sup>-1</sup> | <i>Proteobacteria</i> | <i>Deltaproteobacteria</i> | <i>Bdellovibrionales</i> | <i>Bacteriovoracaceae</i>  | <i>Peredibacter</i>     | 0.0009 |
| 10 <sup>-1</sup> | <i>Proteobacteria</i> | <i>Deltaproteobacteria</i> | <i>Bdellovibrionales</i> | <i>Bdellovibrionaceae</i>  | <i>Bdellovibrio</i>     | 0.0000 |
| 10 <sup>-1</sup> | <i>Proteobacteria</i> | <i>Deltaproteobacteria</i> | <i>Myxococcales</i>      | Other                      | Other                   | 0.0056 |
| 10 <sup>-1</sup> | <i>Proteobacteria</i> | <i>Deltaproteobacteria</i> | <i>Myxococcales</i>      | <i>Cystobacteraceae</i>    | Other                   | 0.0002 |
| 10 <sup>-1</sup> | <i>Proteobacteria</i> | <i>Deltaproteobacteria</i> | <i>Myxococcales</i>      | <i>Polyangiaceae</i>       | Other                   | 0.0018 |
| 10 <sup>-1</sup> | <i>Proteobacteria</i> | <i>Gammaproteobacteria</i> | Other                    | Other                      | Other                   | 0.0131 |
| 10 <sup>-1</sup> | <i>Proteobacteria</i> | <i>Gammaproteobacteria</i> | <i>Enterobacteriales</i> | <i>Enterobacteriaceae</i>  | Other                   | 0.0003 |
| 10 <sup>-1</sup> | <i>Proteobacteria</i> | <i>Gammaproteobacteria</i> | <i>Legionellales</i>     | <i>Legionellaceae</i>      | Other                   | 0.0007 |
| 10 <sup>-1</sup> | <i>Proteobacteria</i> | <i>Gammaproteobacteria</i> | <i>Legionellales</i>     | <i>Legionellaceae</i>      | <i>Legionella</i>       | 0.0007 |
| 10 <sup>-1</sup> | <i>Proteobacteria</i> | <i>Gammaproteobacteria</i> | <i>Pseudomonadales</i>   | <i>Moraxellaceae</i>       | <i>Alkanindiges</i>     | 0.0002 |

|                  |                         |                            |                                             |                            |                          |        |
|------------------|-------------------------|----------------------------|---------------------------------------------|----------------------------|--------------------------|--------|
| 10 <sup>-1</sup> | <i>Proteobacteria</i>   | <i>Gammaproteobacteria</i> | <i>Xanthomonadales</i>                      | <i>Sinobacteraceae</i>     | Other                    | 0.0003 |
| 10 <sup>-1</sup> | <i>Proteobacteria</i>   | <i>Gammaproteobacteria</i> | <i>Xanthomonadales</i>                      | <i>Xanthomonadaceae</i>    | Other                    | 0.0522 |
| 10 <sup>-1</sup> | <i>Proteobacteria</i>   | <i>Gammaproteobacteria</i> | <i>Xanthomonadales</i>                      | <i>Xanthomonadaceae</i>    | <i>Pseudoxanthomonas</i> | 0.0034 |
| 10 <sup>-1</sup> | TM7                     | TM7_genera_incertae_sedis  | Other                                       | Other                      | Other                    | 0.0001 |
| 10 <sup>-1</sup> | <i>Verrucomicrobia</i>  | <i>Opitutae</i>            | <i>Opitiales</i>                            | <i>Opitutaceae</i>         | <i>Opitutus</i>          | 0.0293 |
| 10 <sup>-1</sup> | <i>Verrucomicrobia</i>  | <i>Spartobacteria</i>      | Other                                       | Other                      | Other                    | 0.0011 |
| 10 <sup>-1</sup> | <i>Verrucomicrobia</i>  | <i>Spartobacteria</i>      | <i>Spartobacteria_genera_incertae_sedis</i> | Other                      | Other                    | 0.0078 |
| 10 <sup>-1</sup> | <i>Verrucomicrobia</i>  | Subdivision3               | Subdivision3_genera_incertae_sedis          | Other                      | Other                    | 0.0118 |
| 10 <sup>-6</sup> | Other                   | Other                      | Other                                       | Other                      | Other                    | 0.0912 |
| 10 <sup>-6</sup> | <i>Acidobacteria</i>    | <i>Acidobacteria_Gp1</i>   | <i>Gp1</i>                                  | Other                      | Other                    | 0.0014 |
| 10 <sup>-6</sup> | <i>Acidobacteria</i>    | <i>Acidobacteria_Gp3</i>   | <i>Gp3</i>                                  | Other                      | Other                    | 0.0036 |
| 10 <sup>-6</sup> | <i>Actinobacteria</i>   | <i>Actinobacteria</i>      | <i>Actinomycetales</i>                      | Other                      | Other                    | 0.0010 |
| 10 <sup>-6</sup> | <i>Bacteroidetes</i>    | Other                      | Other                                       | Other                      | Other                    | 0.0454 |
| 10 <sup>-6</sup> | <i>Bacteroidetes</i>    | <i>Flavobacteria</i>       | <i>Flavobacteriales</i>                     | <i>Cryomorphaceae</i>      | <i>Fluviicola</i>        | 0.0031 |
| 10 <sup>-6</sup> | <i>Bacteroidetes</i>    | <i>Flavobacteria</i>       | <i>Flavobacteriales</i>                     | <i>Flavobacteriaceae</i>   | <i>Flavobacterium</i>    | 0.0151 |
| 10 <sup>-6</sup> | <i>Bacteroidetes</i>    | <i>Sphingobacteria</i>     | <i>Sphingobacteriales</i>                   | Other                      | Other                    | 0.0172 |
| 10 <sup>-6</sup> | <i>Bacteroidetes</i>    | <i>Sphingobacteria</i>     | <i>Sphingobacteriales</i>                   | <i>Chitinophagaceae</i>    | Other                    | 0.1008 |
| 10 <sup>-6</sup> | <i>Bacteroidetes</i>    | <i>Sphingobacteria</i>     | <i>Sphingobacteriales</i>                   | <i>Sphingobacteriaceae</i> | Other                    | 0.0008 |
| 10 <sup>-6</sup> | <i>Bacteroidetes</i>    | <i>Sphingobacteria</i>     | <i>Sphingobacteriales</i>                   | <i>Sphingobacteriaceae</i> | <i>Pedobacter</i>        | 0.0204 |
| 10 <sup>-6</sup> | <i>Cyanobacteria</i>    | <i>Cyanobacteria</i>       | <i>Chloroplast</i>                          | <i>Streptophyta</i>        | Other                    | 0.0001 |
| 10 <sup>-6</sup> | <i>Gemmatimonadetes</i> | <i>Gemmatimonadetes</i>    | <i>Gemmatimonadales</i>                     | <i>Gemmatimonadaceae</i>   | <i>Gemmatimonas</i>      | 0.0300 |
| 10 <sup>-6</sup> | <i>Planctomycetes</i>   | <i>Planctomycetacia</i>    | <i>Planctomycetales</i>                     | <i>Planctomycetaceae</i>   | Other                    | 0.1121 |
| 10 <sup>-6</sup> | <i>Planctomycetes</i>   | <i>Planctomycetacia</i>    | <i>Planctomycetales</i>                     | <i>Planctomycetaceae</i>   | <i>Zavarzinella</i>      | 0.0035 |
| 10 <sup>-6</sup> | <i>Proteobacteria</i>   | <i>Alphaproteobacteria</i> | <i>Rhizobiales</i>                          | Other                      | Other                    | 0.0091 |
| 10 <sup>-6</sup> | <i>Proteobacteria</i>   | <i>Alphaproteobacteria</i> | <i>Rhizobiales</i>                          | <i>Xanthobacteraceae</i>   | <i>Labrys</i>            | 0.0003 |
| 10 <sup>-6</sup> | <i>Proteobacteria</i>   | <i>Alphaproteobacteria</i> | <i>Rhodobacterales</i>                      | <i>Rhodobacteraceae</i>    | Other                    | 0.0002 |
| 10 <sup>-6</sup> | <i>Proteobacteria</i>   | <i>Alphaproteobacteria</i> | <i>Rhodospirillales</i>                     | Other                      | Other                    | 0.0030 |

|                  |                        |                            |                                             |                             |                          |        |
|------------------|------------------------|----------------------------|---------------------------------------------|-----------------------------|--------------------------|--------|
| 10 <sup>-6</sup> | <i>Proteobacteria</i>  | <i>Alphaproteobacteria</i> | <i>Sphingomonadales</i>                     | <i>Sphingomonadaceae</i>    | <i>Sphingomonas</i>      | 0.0227 |
| 10 <sup>-6</sup> | <i>Proteobacteria</i>  | <i>Betaproteobacteria</i>  | Other                                       | Other                       | Other                    | 0.0013 |
| 10 <sup>-6</sup> | <i>Proteobacteria</i>  | <i>Betaproteobacteria</i>  | <i>Burkholderiales</i>                      | <i>Oxalobacteraceae</i>     | <i>Herbaspirillum</i>    | 0.0001 |
| 10 <sup>-6</sup> | <i>Proteobacteria</i>  | <i>Betaproteobacteria</i>  | <i>Burkholderiales</i>                      | <i>Oxalobacteraceae</i>     | <i>Janthinobacterium</i> | 0.0003 |
| 10 <sup>-6</sup> | <i>Proteobacteria</i>  | <i>Deltaproteobacteria</i> | Other                                       | Other                       | Other                    | 0.0005 |
| 10 <sup>-6</sup> | <i>Proteobacteria</i>  | <i>Deltaproteobacteria</i> | <i>Myxococcales</i>                         | Other                       | Other                    | 0.0034 |
| 10 <sup>-6</sup> | <i>Proteobacteria</i>  | <i>Gammaproteobacteria</i> | Other                                       | Other                       | Other                    | 0.0025 |
| 10 <sup>-6</sup> | <i>Proteobacteria</i>  | <i>Gammaproteobacteria</i> | <i>Legionellales</i>                        | <i>Coxiellaceae</i>         | <i>Aquicella</i>         | 0.0002 |
| 10 <sup>-6</sup> | <i>Proteobacteria</i>  | <i>Gammaproteobacteria</i> | <i>Pseudomonadales</i>                      | <i>Moraxellaceae</i>        | <i>Acinetobacter</i>     | 0.0001 |
| 10 <sup>-6</sup> | <i>Proteobacteria</i>  | <i>Gammaproteobacteria</i> | <i>Pseudomonadales</i>                      | <i>Pseudomonadaceae</i>     | Other                    | 0.0004 |
| 10 <sup>-6</sup> | <i>Proteobacteria</i>  | <i>Gammaproteobacteria</i> | <i>Pseudomonadales</i>                      | <i>Pseudomonadaceae</i>     | <i>Pseudomonas</i>       | 0.0081 |
| 10 <sup>-6</sup> | <i>Verrucomicrobia</i> | Other                      | Other                                       | Other                       | Other                    | 0.0300 |
| 10 <sup>-6</sup> | <i>Verrucomicrobia</i> | <i>Opitutae</i>            | <i>Opitales</i>                             | <i>Opitutaceae</i>          | Other                    | 0.0318 |
| 10 <sup>-6</sup> | <i>Verrucomicrobia</i> | <i>Opitutae</i>            | <i>Opitales</i>                             | <i>Opitutaceae</i>          | <i>Opitutus</i>          | 0.0468 |
| 10 <sup>-6</sup> | <i>Verrucomicrobia</i> | <i>Spartobacteria</i>      | <i>Spartobacteria_genera_incertae_sedis</i> | Other                       | Other                    | 0.0073 |
| 10 <sup>-6</sup> | <i>Verrucomicrobia</i> | <i>Subdivision3</i>        | <i>Subdivision3_genera_incertae_sedis</i>   | Other                       | Other                    | 0.0060 |
| 10 <sup>-6</sup> | <i>Verrucomicrobia</i> | <i>Verrucomicrobiae</i>    | <i>Verrucomicrobiales</i>                   | <i>Verrucomicrobiaceae</i>  | <i>Verrucomicrobium</i>  | 0.0002 |
| 10 <sup>-9</sup> | Other                  | Other                      | Other                                       | Other                       | Other                    | 0.0517 |
| 10 <sup>-9</sup> | <i>Acidobacteria</i>   | <i>Acidobacteria_Gp1</i>   | <i>Gp1</i>                                  | Other                       | Other                    | 0.0017 |
| 10 <sup>-9</sup> | <i>Actinobacteria</i>  | <i>Actinobacteria</i>      | Other                                       | Other                       | Other                    | 0.0011 |
| 10 <sup>-9</sup> | <i>Actinobacteria</i>  | <i>Actinobacteria</i>      | <i>Acidimicrobiales</i>                     | Other                       | Other                    | 0.0004 |
| 10 <sup>-9</sup> | <i>Actinobacteria</i>  | <i>Actinobacteria</i>      | <i>Actinomycetales</i>                      | Other                       | Other                    | 0.0024 |
| 10 <sup>-9</sup> | <i>Actinobacteria</i>  | <i>Actinobacteria</i>      | <i>Actinomycetales</i>                      | <i>Nocardioideaceae</i>     | <i>Nocardioides</i>      | 0.0006 |
| 10 <sup>-9</sup> | <i>Actinobacteria</i>  | <i>Actinobacteria</i>      | <i>Actinomycetales</i>                      | <i>Pseudonocardiaceae</i>   | <i>Pseudonocardia</i>    | 0.0006 |
| 10 <sup>-9</sup> | <i>Actinobacteria</i>  | <i>Actinobacteria</i>      | <i>Actinomycetales</i>                      | <i>Streptosporangiaceae</i> | Other                    | 0.0002 |
| 10 <sup>-9</sup> | <i>Actinobacteria</i>  | <i>Actinobacteria</i>      | <i>Solirubrobacterales</i>                  | <i>Patulibacteraceae</i>    | <i>Patulibacter</i>      | 0.0001 |
| 10 <sup>-9</sup> | <i>Bacteroidetes</i>   | Other                      | Other                                       | Other                       | Other                    | 0.0444 |

|                  |                                 |                            |                           |                            |                          |        |
|------------------|---------------------------------|----------------------------|---------------------------|----------------------------|--------------------------|--------|
| 10 <sup>-9</sup> | <i>Bacteroidetes</i>            | <i>Flavobacteria</i>       | <i>Flavobacteriales</i>   | <i>Flavobacteriaceae</i>   | <i>Chryseobacterium</i>  | 0.0001 |
| 10 <sup>-9</sup> | <i>Bacteroidetes</i>            | <i>Flavobacteria</i>       | <i>Flavobacteriales</i>   | <i>Flavobacteriaceae</i>   | <i>Cloacibacterium</i>   | 0.0001 |
| 10 <sup>-9</sup> | <i>Bacteroidetes</i>            | <i>Flavobacteria</i>       | <i>Flavobacteriales</i>   | <i>Flavobacteriaceae</i>   | <i>Flavobacterium</i>    | 0.0167 |
| 10 <sup>-9</sup> | <i>Bacteroidetes</i>            | <i>Sphingobacteria</i>     | <i>Sphingobacteriales</i> | Other                      | Other                    | 0.0082 |
| 10 <sup>-9</sup> | <i>Bacteroidetes</i>            | <i>Sphingobacteria</i>     | <i>Sphingobacteriales</i> | <i>Chitinophagaceae</i>    | Other                    | 0.0742 |
| 10 <sup>-9</sup> | <i>Bacteroidetes</i>            | <i>Sphingobacteria</i>     | <i>Sphingobacteriales</i> | <i>Cytophagaceae</i>       | <i>Dyadobacter</i>       | 0.0098 |
| 10 <sup>-9</sup> | <i>Bacteroidetes</i>            | <i>Sphingobacteria</i>     | <i>Sphingobacteriales</i> | <i>Sphingobacteriaceae</i> | <i>Pedobacter</i>        | 0.0408 |
| 10 <sup>-9</sup> | <i>Chlamydiae</i>               | <i>Chlamydiae</i>          | <i>Chlamydiales</i>       | <i>Parachlamydiaceae</i>   | Other                    | 0.0002 |
| 10 <sup>-9</sup> | <i>Deinococcus-<br/>Thermus</i> | <i>Deinococci</i>          | <i>Deinococcales</i>      | <i>Deinococcaceae</i>      | <i>Deinococcus</i>       | 0.0220 |
| 10 <sup>-9</sup> | <i>Firmicutes</i>               | <i>Bacilli</i>             | <i>Bacillales</i>         | Other                      | Other                    | 0.0021 |
| 10 <sup>-9</sup> | <i>Firmicutes</i>               | <i>Bacilli</i>             | <i>Bacillales</i>         | <i>Paenibacillaceae</i>    | <i>Cohnella</i>          | 0.0065 |
| 10 <sup>-9</sup> | <i>Firmicutes</i>               | <i>Bacilli</i>             | <i>Bacillales</i>         | <i>Paenibacillaceae</i>    | <i>Paenibacillus</i>     | 0.0012 |
| 10 <sup>-9</sup> | <i>Firmicutes</i>               | <i>Clostridia</i>          | <i>Clostridiales</i>      | Other                      | Other                    | 0.0001 |
| 10 <sup>-9</sup> | <i>Planctomycetes</i>           | <i>Planctomycetacia</i>    | <i>Planctomycetales</i>   | <i>Planctomycetaceae</i>   | Other                    | 0.0130 |
| 10 <sup>-9</sup> | <i>Planctomycetes</i>           | <i>Planctomycetacia</i>    | <i>Planctomycetales</i>   | <i>Planctomycetaceae</i>   | <i>Gemmata</i>           | 0.0007 |
| 10 <sup>-9</sup> | <i>Planctomycetes</i>           | <i>Planctomycetacia</i>    | <i>Planctomycetales</i>   | <i>Planctomycetaceae</i>   | <i>Planctomyces</i>      | 0.0014 |
| 10 <sup>-9</sup> | <i>Proteobacteria</i>           | <i>Alphaproteobacteria</i> | <i>Rhizobiales</i>        | Other                      | Other                    | 0.0046 |
| 10 <sup>-9</sup> | <i>Proteobacteria</i>           | <i>Alphaproteobacteria</i> | <i>Rhizobiales</i>        | <i>Brucellaceae</i>        | <i>Pseudochrobactrum</i> | 0.0001 |
| 10 <sup>-9</sup> | <i>Proteobacteria</i>           | <i>Alphaproteobacteria</i> | <i>Rhizobiales</i>        | <i>Methylobacteriaceae</i> | <i>Methylobacterium</i>  | 0.0001 |
| 10 <sup>-9</sup> | <i>Proteobacteria</i>           | <i>Alphaproteobacteria</i> | <i>Rhodospirillales</i>   | <i>Rhodospirillaceae</i>   | <i>Inquilinus</i>        | 0.0010 |
| 10 <sup>-9</sup> | <i>Proteobacteria</i>           | <i>Alphaproteobacteria</i> | <i>Sphingomonadales</i>   | <i>Sphingomonadaceae</i>   | Other                    | 0.0021 |
| 10 <sup>-9</sup> | <i>Proteobacteria</i>           | <i>Alphaproteobacteria</i> | <i>Sphingomonadales</i>   | <i>Sphingomonadaceae</i>   | <i>Novosphingobium</i>   | 0.0003 |
| 10 <sup>-9</sup> | <i>Proteobacteria</i>           | <i>Betaproteobacteria</i>  | Other                     | Other                      | Other                    | 0.0005 |
| 10 <sup>-9</sup> | <i>Proteobacteria</i>           | <i>Betaproteobacteria</i>  | <i>Burkholderiales</i>    | <i>Alcaligenaceae</i>      | Other                    | 0.0012 |
| 10 <sup>-9</sup> | <i>Proteobacteria</i>           | <i>Betaproteobacteria</i>  | <i>Burkholderiales</i>    | <i>Comamonadaceae</i>      | Other                    | 0.0119 |
| 10 <sup>-9</sup> | <i>Proteobacteria</i>           | <i>Deltaproteobacteria</i> | <i>Bdellovibrionales</i>  | <i>Bdellovibrionaceae</i>  | <i>Bdellovibrio</i>      | 0.0042 |
| 10 <sup>-9</sup> | <i>Proteobacteria</i>           | <i>Deltaproteobacteria</i> | <i>Myxococcales</i>       | Other                      | Other                    | 0.0010 |

|                  |                        |                                     |                           |                            |       |        |
|------------------|------------------------|-------------------------------------|---------------------------|----------------------------|-------|--------|
| 10 <sup>-9</sup> | <i>TM7</i>             | <i>TM7_genera_incertainae_sedis</i> | Other                     | Other                      | Other | 0.0001 |
| 10 <sup>-9</sup> | <i>Verrucomicrobia</i> | Other                               | Other                     | Other                      | Other | 0.1487 |
| 10 <sup>-9</sup> | <i>Verrucomicrobia</i> | <i>Verrucomicrobiae</i>             | <i>Verrucomicrobiales</i> | Other                      | Other | 0.0012 |
| 10 <sup>-9</sup> | <i>Verrucomicrobia</i> | <i>Verrucomicrobiae</i>             | <i>Verrucomicrobiales</i> | <i>Verrucomicrobiaceae</i> | Other | 0.0212 |

## LEGENDS OF SUPPLEMENTARY FIGURES

**FIG S1** Average bacterial abundance in soil after incubation of the replicate samples of the three dilution treatments as estimated by real time PCR (Mean ± SE, n=5).

**FIG S2** Bacterial community composition at phylum level of six replicate samples of three dilutions of a soil suspension. The dilution level is shown below each bar. Data on the communities of the 10<sup>-1</sup> and 10<sup>-9</sup> dilution of replicate 4 are not available.

**FIG S3** Bacterial community composition at phylum level of six replicate samples of the three dilutions after incubation in soil. The dilution level is shown below each bar. Data on the communities of the 10<sup>-1</sup> and 10<sup>-9</sup> dilution of replicate 4 are not available.

**FIG S4** Bacterial community composition at family level of three dilutions of a soil suspension and related soil samples after incubation.



Fig S2

Fig S1

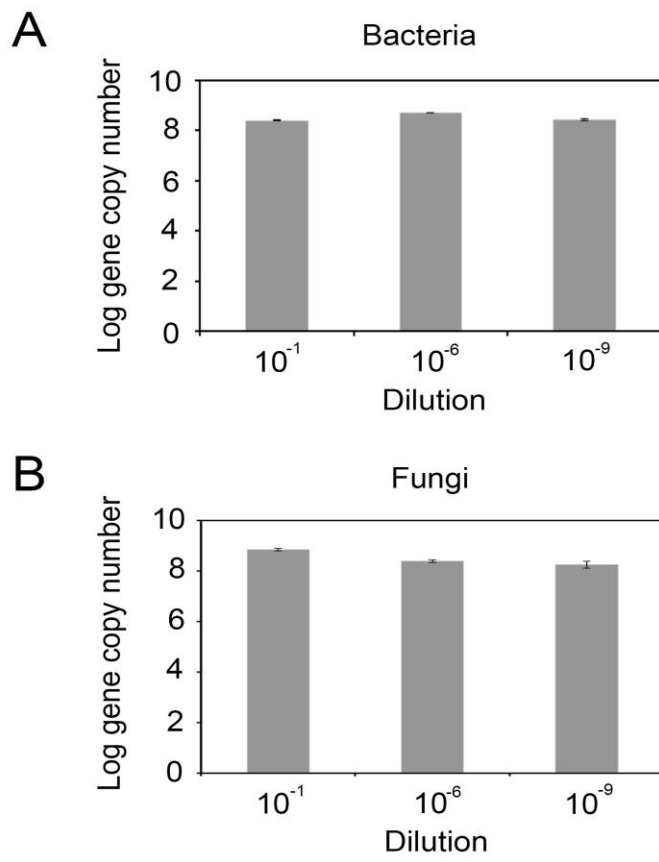

Fig S2

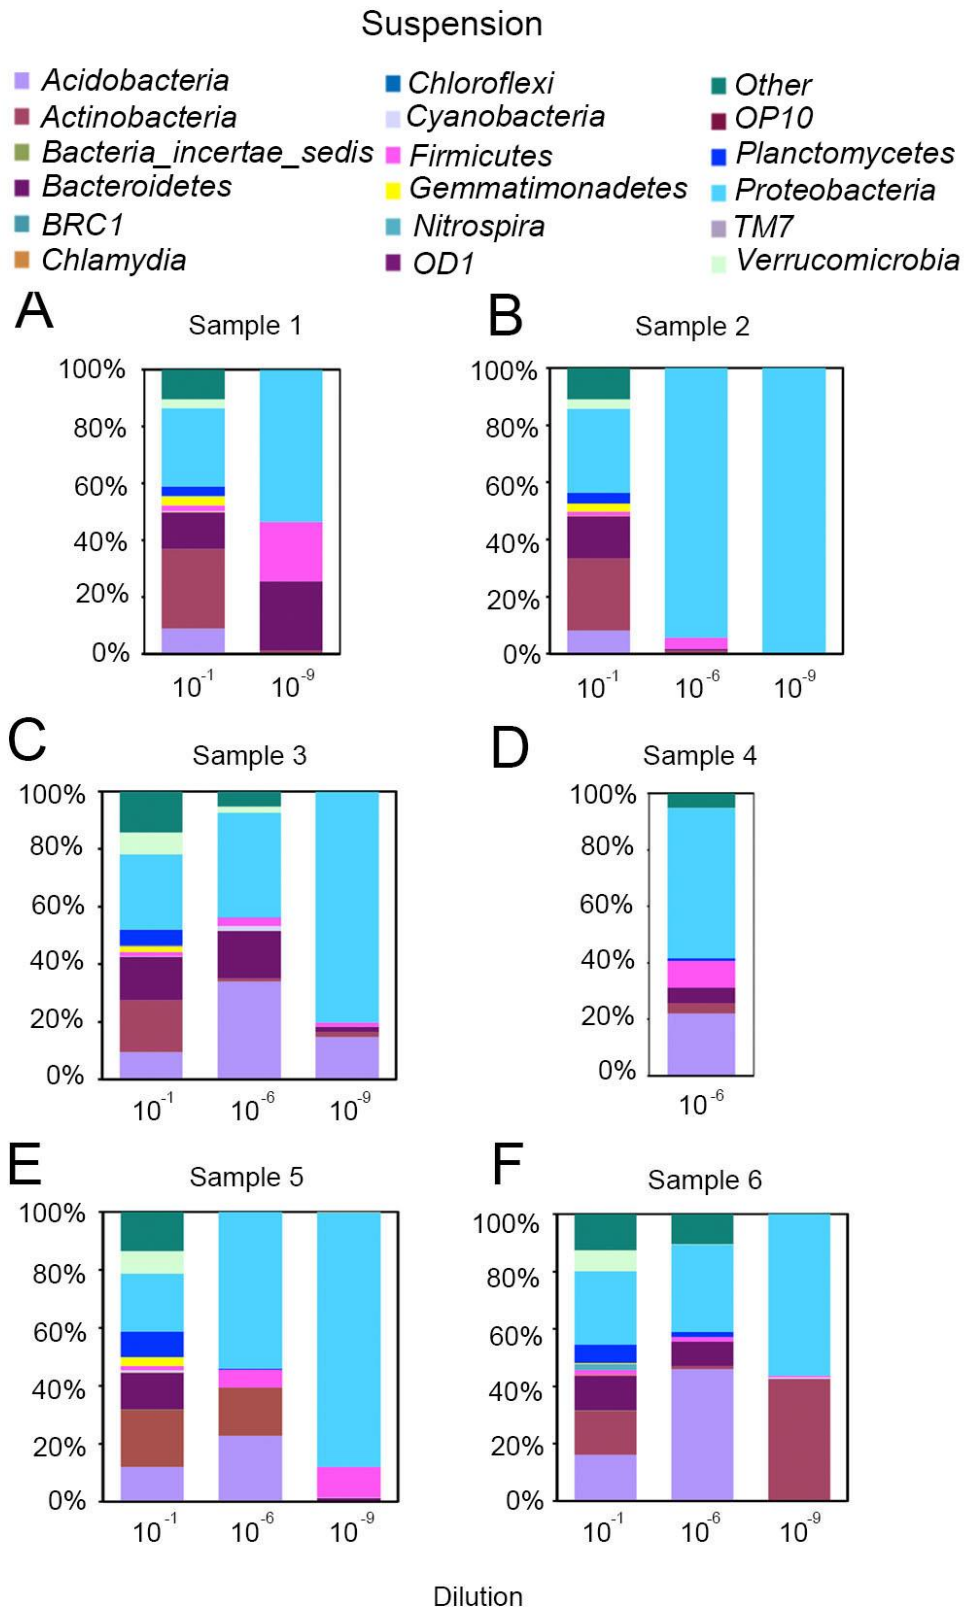

**Fig S3**

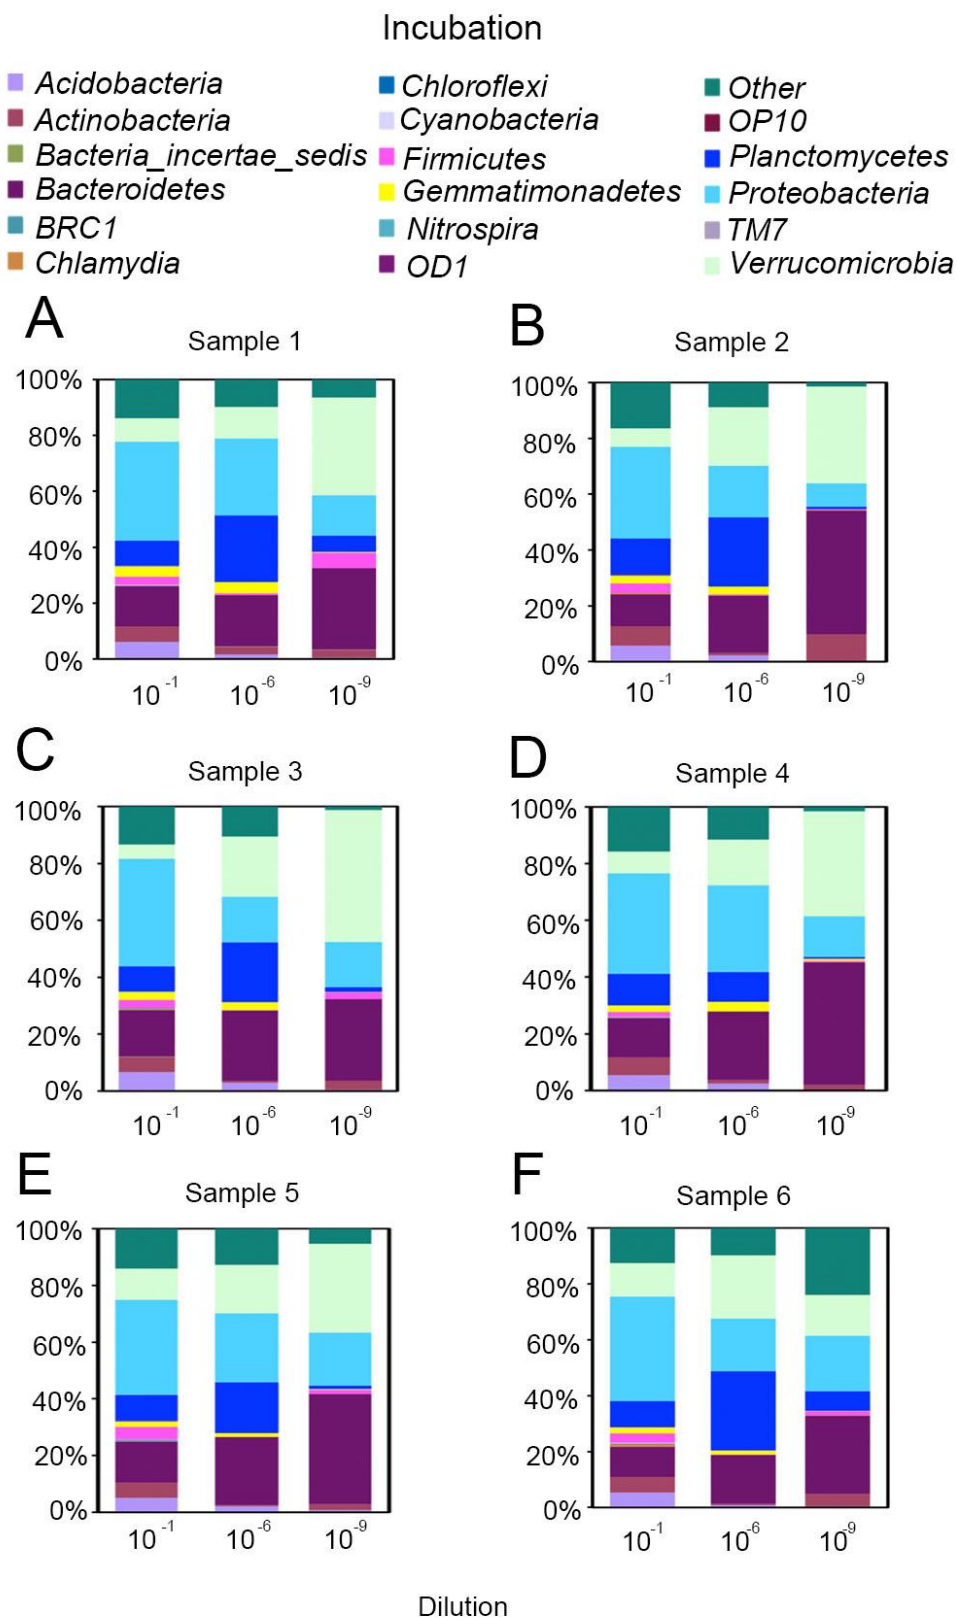

**Fig S4**

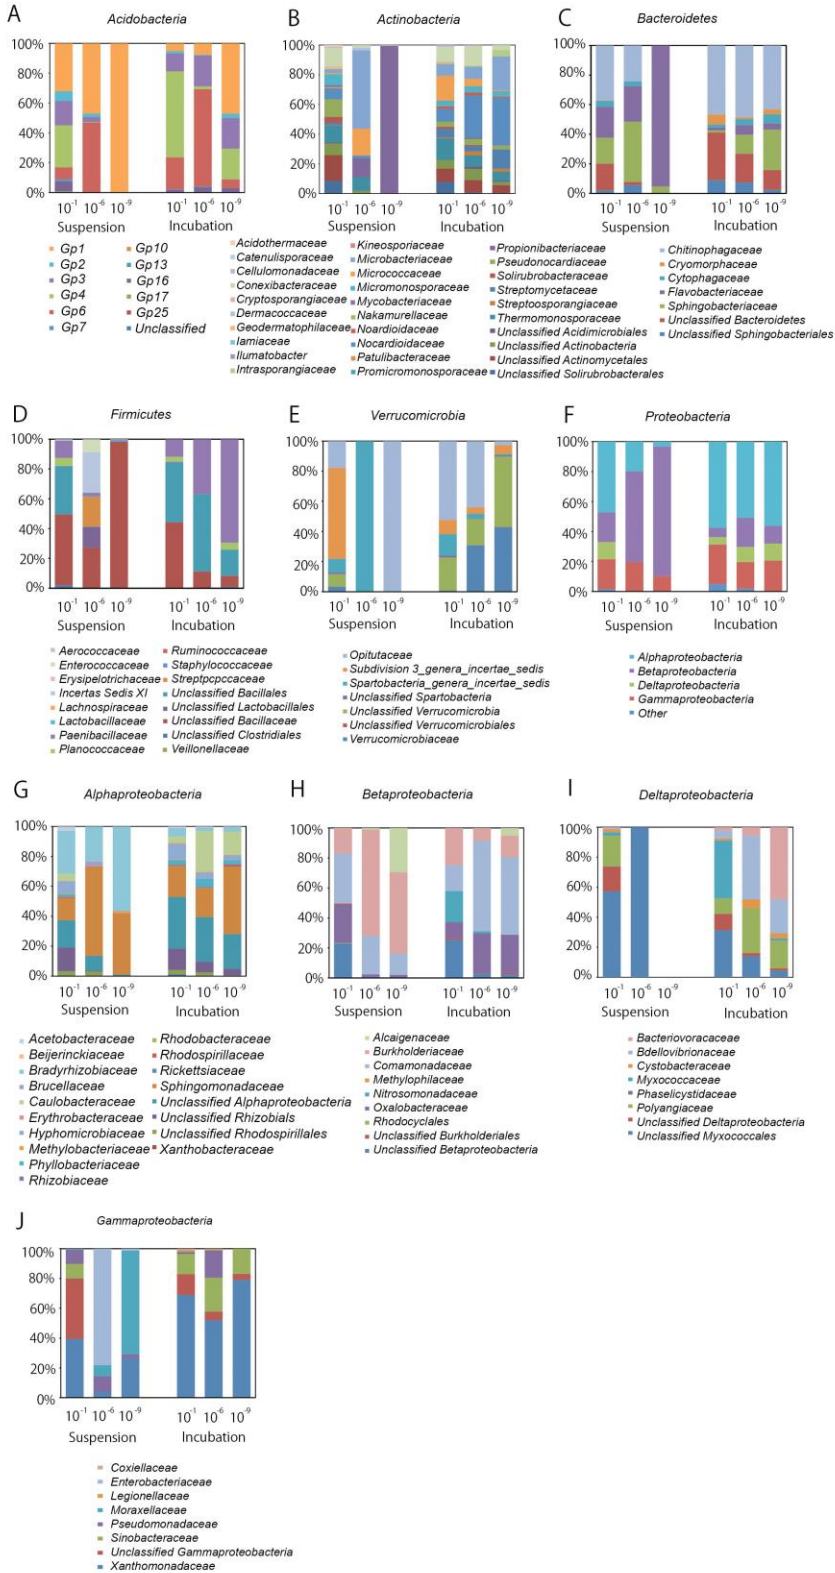

Supplement: AEM.00958-15_zam999116342so1.pdf [file AEM.00958-15_zam999116342so1.pdf]
